# Supplementary material for: The Influence of Temperature and Viscosity of Polyethylene Glycol on the Rate of Microwave-Induced In Situ Amorphization of Celecoxib
Source: MDPI journal article supplement (doi:10.3390/molecules26010110), 2020-12-29
Supplement: s1 [file s1]

Supplementary material:

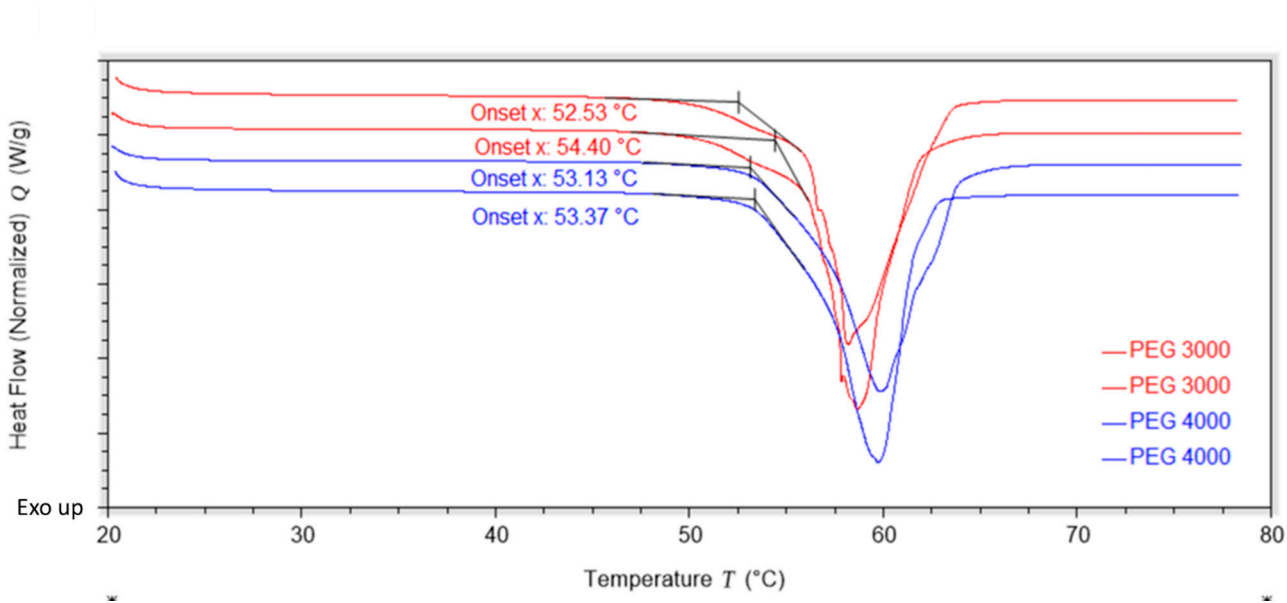

**Figure S1:** Melting points of PEG 3000 (red) and PEG 4000 (blue). Exo up. No y-scaling due to overlay ( $n = 2$ ).

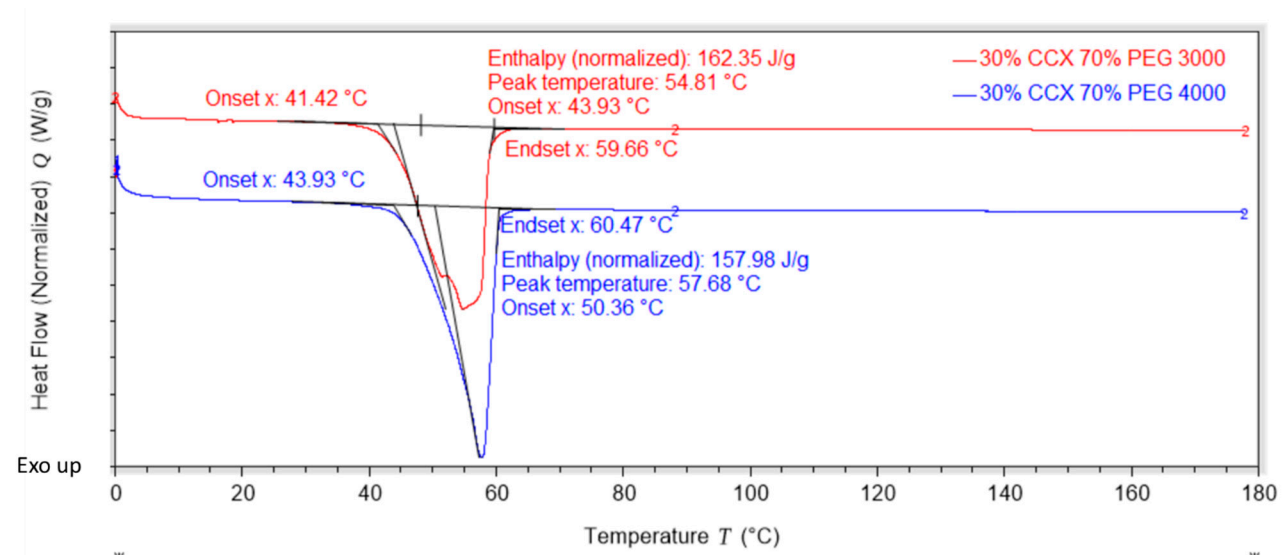

**Figure S2:** Monotectic formation of 30% CCX with 70% PEG 3000 (red) and PEG 4000 (blue). Exo up. No y-scaling due to overlay. (Note: different kinetics and heating mechanism in the DSC and the microwave oven).

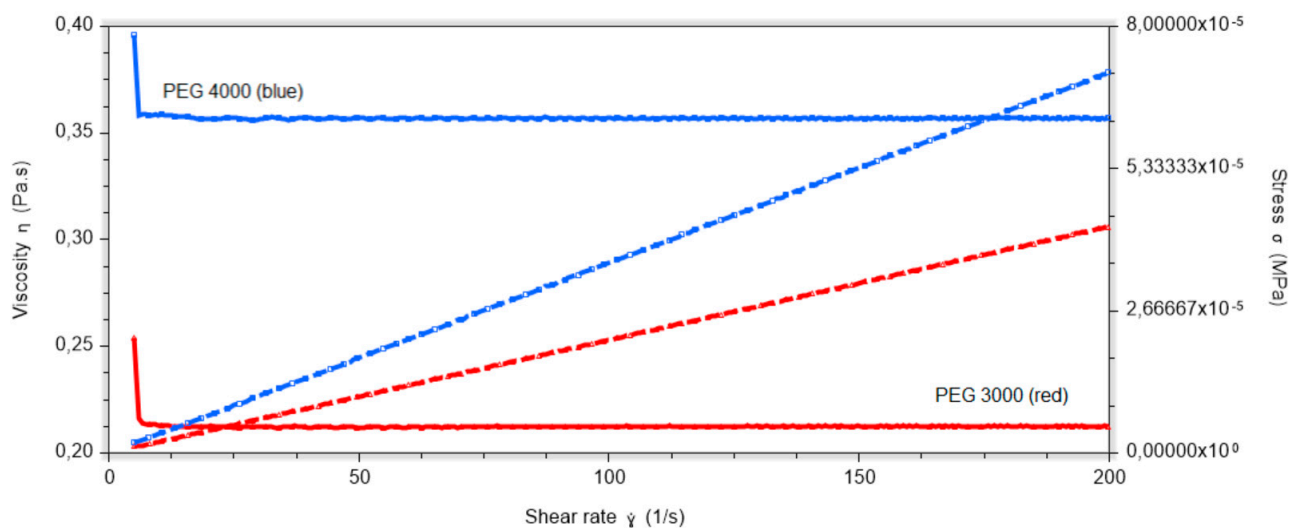

**Figure S3:** Shear-rate dependent viscograms obtained for PEG 3000 (red) and PEG 4000 (blue). The solid lines show the viscosity as a function of the shear rate (left y-axis). The dashed lines show the stress as a function of the shear rate (right y-axis) ( $n = 1$ ).
